# Supplementary material for: CRISPR/Cas9-mediated TGFβRII disruption enhances anti-tumor efficacy of human chimeric antigen receptor T cells in vitro
Source: PubMed Central journal article supplement (PMC8627098; doi:10.1186/s12967-021-03146-0), 2021-11-27

**A**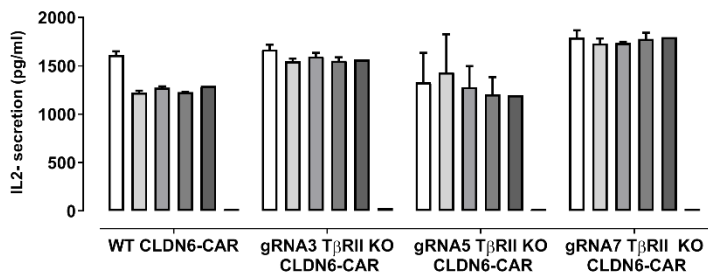**B**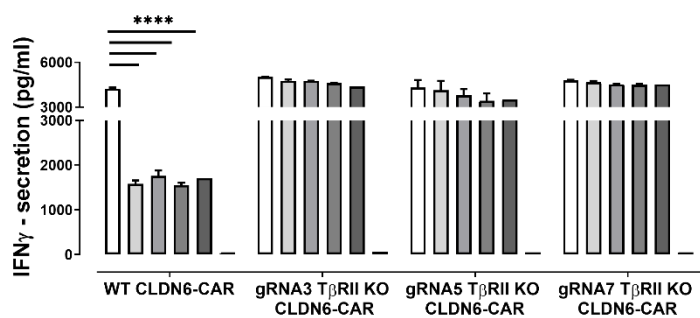**C**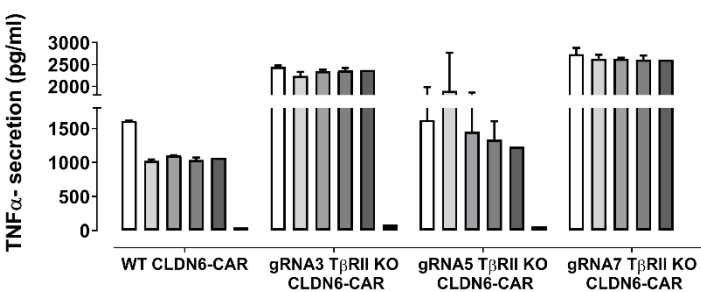**D**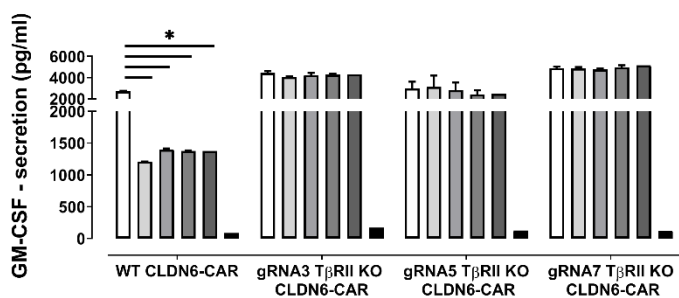**E**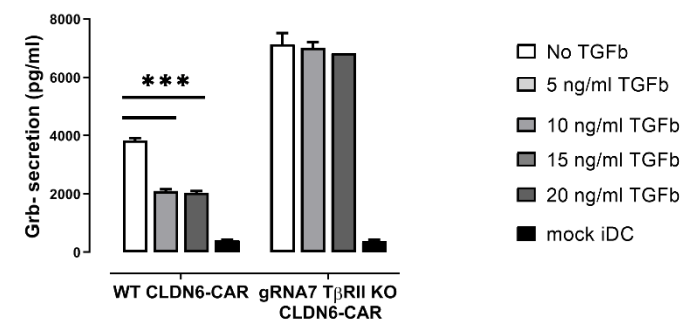

Supplement: 12967_2021_3146_MOESM3_ESM.pdf [file 12967_2021_3146_MOESM3_ESM.pdf]
